# Supplementary material for: Dual-Emission Fluorescence Probe Based on CdTe Quantum Dots and Rhodamine B for Visual Detection of Mercury and Its Logic Gate Behavior
Source: MDPI journal article supplement (doi:10.3390/mi12060713), 2021-06-18
Supplement: s1 [file s1]

## Supplementary: Dual-emission fluorescence probe based on CdTe Quantum Dots and Rhodamine B for visual detection of mercury and its logic gate behavior

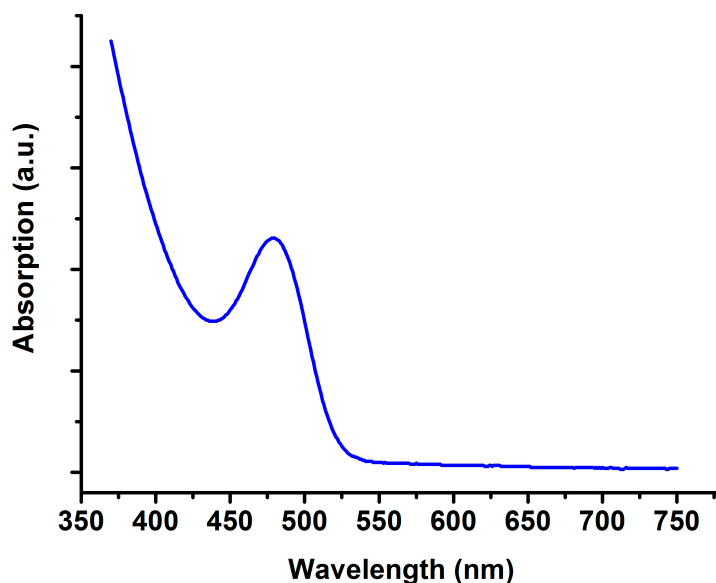

Figure S1. Absorption spectrum of CdTe QDs.

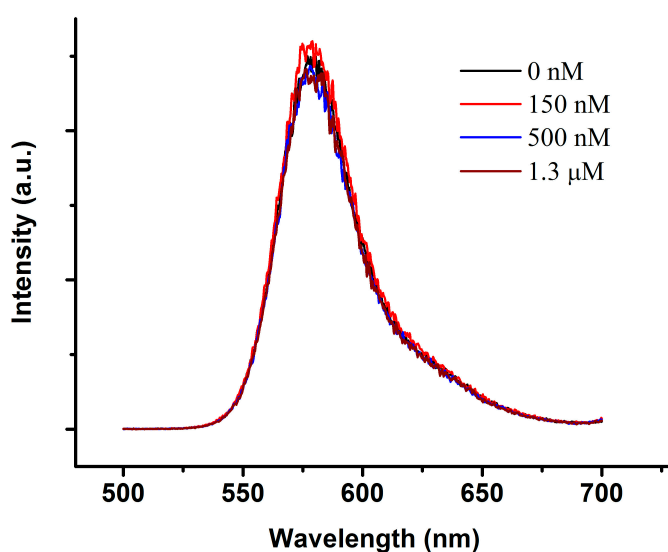

Figure S2. Emission spectra of Rhodamine B with different concentrations of  $\text{Hg}^{2+}$  under excitation of 365 nm.

Table S1. Selectivity coefficients of the interference ions.

| Ions.                    | $\text{Na}^+$ | $\text{K}^+$ | $\text{Ca}^{2+}$ | $\text{Mg}^{2+}$ | $\text{Zn}^{2+}$ | $\text{Cd}^{2+}$ | $\text{Pb}^{2+}$ | $\text{Co}^{2+}$ | $\text{Ni}^{2+}$ | $\text{Ag}^+$ |
|--------------------------|---------------|--------------|------------------|------------------|------------------|------------------|------------------|------------------|------------------|---------------|
| Selectivity coefficients | 0.0013        | 0.0058       | 0.0073           | 0.0042           | 0.0060           | 0.0037           | 0.0092           | 0.0063           | 0.0121           | 0.0047        |
